# Supplementary material for: Assessment of the Midseason Crop Coefficient for the Evaluation of the Water Demand of Young, Grafted Hazelnut Trees in High-Density Orchards
Source: MDPI journal article supplement (doi:10.3390/w15091683), 2023-04-26
Supplement: s1 [file s1]

Archive with 1 entries (1 files):
- water-2253816-supplementary.pdf
