# Supplementary material for: Assessment of the Midseason Crop Coefficient for the Evaluation of the Water Demand of Young, Grafted Hazelnut Trees in High-Density Orchards
Source: MDPI journal article supplement (doi:10.3390/w15091683), 2023-04-26
Supplement: s1 [file s1 › water-2253816-supplementary.pdf]

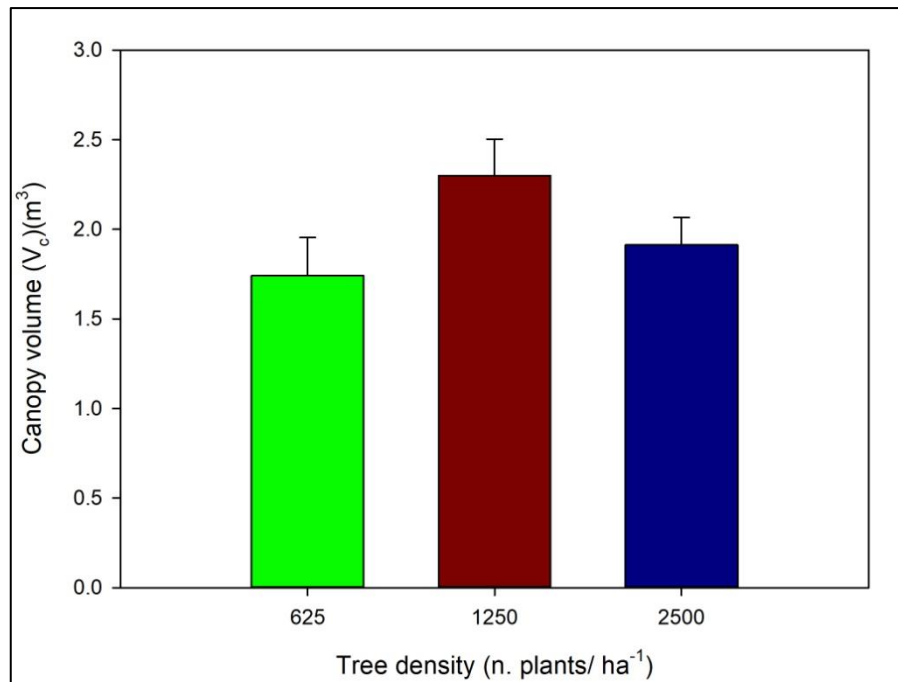

Figure S1. Canopy volume ( $V_c$ ) in the three plant densities (means  $\pm$  s.e.)

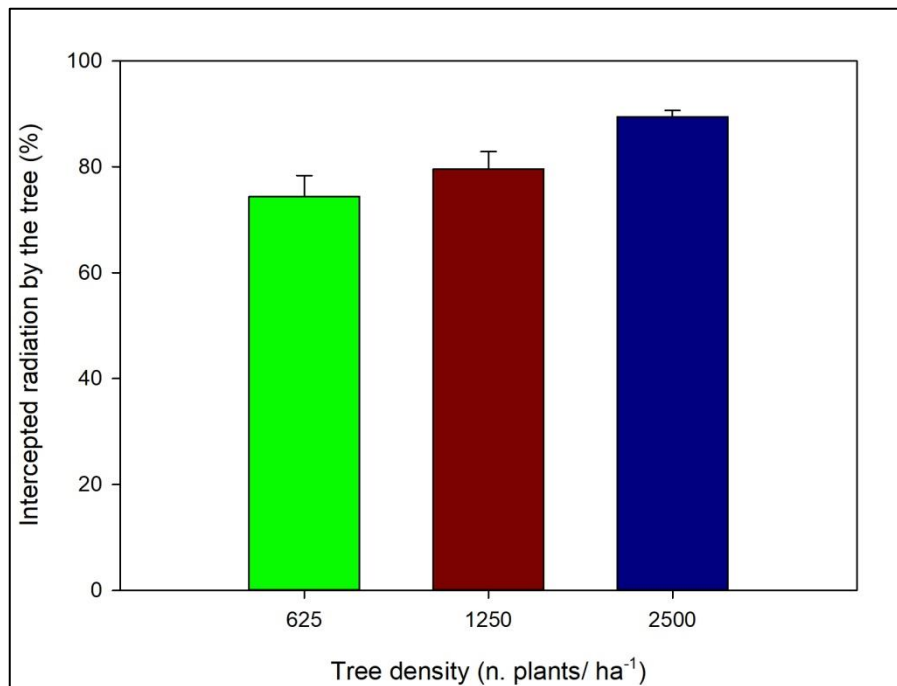

Figure S2. Intercepted radiation by the tree, expressed as percentage of the external radiation, in the three plant densities (means  $\pm$  s.e.)

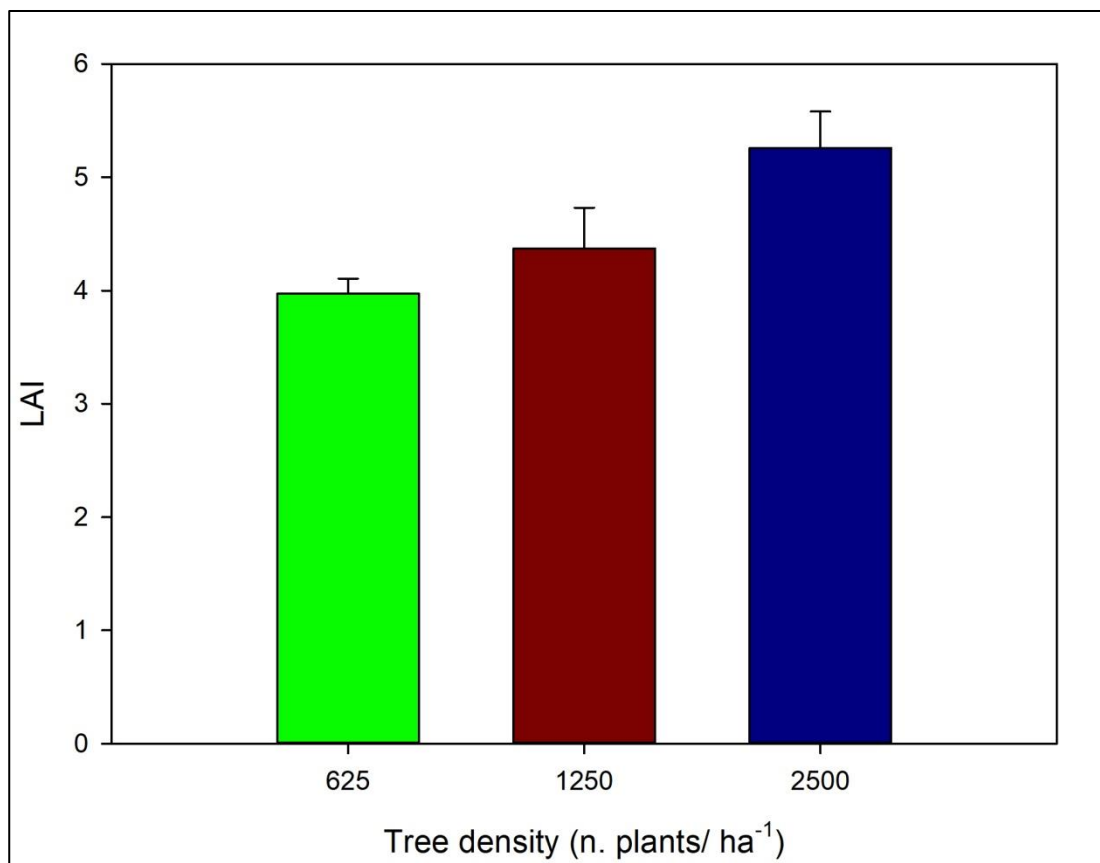

Figure S3. Leaf area index (LAI) in the three plant densities (means  $\pm$  s.e.), in the three plant densities (means  $\pm$  s.e.)
